# Supplementary material for: Transcriptome Analysis on Maternal Separation Rats With Depression-Related Manifestations Ameliorated by Electroacupuncture
Source: Front Neurosci. 2019 Apr 5;13:314. doi: 10.3389/fnins.2019.00314 (PMC6460510; doi:10.3389/fnins.2019.00314)
Supplement: TABLE S2 — Differentially expressed mRNA/lncRNA/circRNA in rats. [file Table_2.XLSX]

## Sheet: mRNA_MS VS Control
AccID	type_of_gene	Log2FC	FDR	Expression Style	Symbol	Description
Dip2b	protein-coding	-20	0.00217025	down	Dip2b	DIP2 disco-interacting protein 2 homolog B (Drosophila)
LOC100909986	protein-coding	-2.96378	0.0226532	down	LOC100909986	doublesex- and mab-3-related transcription factor C1-like
Abcg2	protein-coding	-1.00136	2.39392e-07	down	Abcg2	ATP-binding cassette, subfamily G (WHITE), member 2
LOC100912380	protein-coding	-0.882116	0.000480178	down	LOC100912380	calpain small subunit 1-like
Gadd45g	protein-coding	-0.855796	4.05773e-06	down	Gadd45g	growth arrest and DNA-damage-inducible, gamma
Egfem1	protein-coding	-0.838541	7.46449e-06	down	Egfem1	EGF-like and EMI domain containing 1
Syt6	protein-coding	-0.697966	0.00251383	down	Syt6	synaptotagmin VI
Cplx3	protein-coding	-0.670441	0.00687772	down	Cplx3	complexin 3
Dbp	protein-coding	-0.668133	6.74829e-06	down	Dbp	D site of albumin promoter (albumin D-box) binding protein
LOC102555167	protein-coding	0.599086	0.0193578	up	LOC102555167	ras-related protein Rab-1B-like
Slc16a1	protein-coding	0.601371	2.62451e-09	up	Slc16a1	solute carrier family 16 (monocarboxylate transporter), member 1
Lrch2	protein-coding	0.603247	0.00925174	up	Lrch2	leucine-rich repeats and calponin homology (CH) domain containing 2
Micu3	protein-coding	0.60821	0	up	Micu3	mitochondrial calcium uptake family, member 3
Bcap29	protein-coding	0.622308	9.52389e-05	up	Bcap29	B-cell receptor-associated protein 29
Spcs3	protein-coding	0.633877	1.5234e-06	up	MGC109340	similar to Microsomal signal peptidase 23 kDa subunit (SPase 22 kDa subunit) (SPC22/23)
Igf1	protein-coding	0.633886	2.97226e-06	up	Igf1	insulin-like growth factor 1
Cav2	protein-coding	0.641392	0.0234927	up	Cav2	caveolin 2
Bet1	protein-coding	0.647671	0.000369488	up	Bet1	Bet1 golgi vesicular membrane trafficking protein
Atp11c	protein-coding	0.650152	0.00018819	up	Atp11c	ATPase, class VI, type 11C
Slco1a2	protein-coding	0.660873	1.07376e-05	up	Slco1a2	solute carrier organic anion transporter family, member 1A2
LOC102551257	protein-coding	0.680213	0.0166834	up	LOC102551257	zinc finger protein 709-like
LOC102551451	protein-coding	0.696622	0.0255051	up	LOC102551451	zinc finger protein 665-like
LOC103693883	protein-coding	0.697444	0.00111613	up	LOC103693883	kelch repeat and BTB domain-containing protein 7-like
Serpinb9	protein-coding	0.701567	2.46255e-05	up	Serpinb9	serpin peptidase inhibitor, clade B (ovalbumin), member 9
Eef1e1	protein-coding	0.714623	0.00353036	up	Eef1e1	eukaryotic translation elongation factor 1 epsilon 1
Stat5a	protein-coding	0.735723	0.0144288	up	Stat5a	signal transducer and activator of transcription 5A
Rex2	protein-coding	0.766491	1.47975e-05	up	Rex2	reduced expression 2
Tc2n	protein-coding	0.858851	0.000137312	up	Tc2n	tandem C2 domains, nuclear
LOC100911238	protein-coding	0.870375	0.00594219	up	LOC100911238	proteasome maturation protein-like
RGD1562161	protein-coding	0.917898	7.41037e-05	up	RGD1562161	similar to chromosome X open reading frame 23
Sult1d1	protein-coding	0.929965	1.62929e-06	up	Sult1d1	sulfotransferase family 1D, member 1
Pcdh7	protein-coding	0.941204	4.47309e-13	up	Pcdh7	protocadherin 7
LOC100134871	protein-coding	0.946883	0.00568759	up	LOC100134871	beta globin minor gene
LOC103694018	protein-coding	0.997637	0.00019811	up	LOC103694018	zinc finger protein 120-like
Mdfic	protein-coding	1.11362	0.00148269	up	Mdfic	MyoD family inhibitor domain containing
Alas2	protein-coding	1.20087	6.89527e-07	up	Alas2	aminolevulinate, delta-, synthase 2
LOC100912282	protein-coding	1.2121	0.00010298	up	LOC100912282	calcium-binding and coiled-coil domain-containing protein 1-like
LOC100910106	protein-coding	1.25866	0.0176625	up	LOC100910106	zinc finger protein 845-like
ATP8	protein-coding	1.40935	0	up	ATP8	ATPase subunit 8
Lpar3	protein-coding	2.17311	0.00311454	up	Lpar3	lysophosphatidic acid receptor 3
Acsm5	protein-coding	2.7569	1.37506e-07	up	Acsm5	acyl-CoA synthetase medium-chain family member 5
Pdilt	protein-coding	2.85722	6.76261e-05	up	Pdilt	protein disulfide isomerase-like, testis expressed
Scube3	protein-coding	3.08795	0.00194134	up	Scube3	signal peptide, CUB domain, EGF-like 3
Acsm3	protein-coding	3.77606	1.37982e-10	up	Acsm3	acyl-CoA synthetase medium-chain family member 3
Ucp3	protein-coding	3.89736	3.00118e-07	up	Ucp3	uncoupling protein 3 (mitochondrial, proton carrier)
Sucnr1	protein-coding	4.06138	0.000513863	up	Sucnr1	succinate receptor 1
LOC100911326	protein-coding	4.85095	0.0233159	up	LOC100911326	uncharacterized LOC100911326
Chrnb3	protein-coding	5.46703	0.00149123	up	Chrnb3	cholinergic receptor, nicotinic, beta 3 (neuronal)

## Sheet: mRNA_EA VS MS
AccID	type_of_gene	Log2FC	FDR	Expression Style	Symbol	Description
Oxt	protein-coding	-6.94772	0.00132248	down	Oxt	oxytocin/neurophysin 1 prepropeptide
LOC100909950	protein-coding	-6.08634	0.0246081	down	LOC100909950	uncharacterized LOC100909950
RGD1560608	protein-coding	-2.9874	0.000389719	down	RGD1560608	similar to novel protein
Ucp3	protein-coding	-2.58952	0.000861222	down	Ucp3	uncoupling protein 3 (mitochondrial, proton carrier)
Vwa5b1	protein-coding	-1.16897	0.000634847	down	Vwa5b1	von Willebrand factor A domain containing 5B1
Cd93	protein-coding	-1.00299	0	down	Cd93	CD93 molecule
Klf4	protein-coding	-0.870857	5.96083e-07	down	Klf4	Kruppel-like factor 4 (gut)
Pih1d1	protein-coding	-0.799084	0.00280043	down	Pih1d1	PIH1 domain containing 1
Arntl	protein-coding	-0.792273	1.14867e-10	down	Arntl	aryl hydrocarbon receptor nuclear translocator-like
Tmem177	protein-coding	-0.749167	0.00856773	down	Tmem177	transmembrane protein 177
Ccnjl	protein-coding	-0.73642	0.00929198	down	Ccnjl	cyclin J-like
Usp43	protein-coding	-0.711731	0.0139449	down	Usp43	ubiquitin specific peptidase 43
LOC102555167	protein-coding	-0.680321	0.00437995	down	LOC102555167	ras-related protein Rab-1B-like
Sowahb	protein-coding	-0.660512	7.75218e-07	down	Sowahb	sosondowah ankyrin repeat domain family member B
Calhm2	protein-coding	-0.63571	0.00457382	down	Calhm2	calcium homeostasis modulator 2
Adra1b	protein-coding	-0.600938	3.22105e-05	down	Adra1b	adrenoceptor alpha 1B
Egr3	protein-coding	-0.600886	1.89046e-06	down	Egr3	early growth response 3
Agt	protein-coding	-0.586006	0.00153903	down	Agt	angiotensinogen (serpin peptidase inhibitor, clade A, member 8)
Agbl3	protein-coding	0.596938	1.8923e-07	up	Agbl3	ATP/GTP binding protein-like 3
Frg1	protein-coding	0.612936	0.0457406	up	Frg1	FSHD region gene 1
Aurkc	protein-coding	0.655795	0.0274371	up	Aurkc	aurora kinase C
Lrif1	protein-coding	0.661934	0.00666053	up	Lrif1	ligand dependent nuclear receptor interacting factor 1
LOC102548248	protein-coding	0.684699	0.0411822	up	LOC102548248	calphotin-like
Per2	protein-coding	0.706193	0.0392199	up	Per2	period circadian clock 2
Sulf1	protein-coding	0.772122	0.000321703	up	Sulf1	sulfatase 1
Per3	protein-coding	0.784541	4.13624e-11	up	Per3	period circadian clock 3
LOC102556504	protein-coding	0.811232	2.29713e-05	up	LOC102556504	titin-like
Dbp	protein-coding	0.869509	2.68908e-08	up	Dbp	D site of albumin promoter (albumin D-box) binding protein
Aspm	protein-coding	0.883501	0.00288311	up	Aspm	asp (abnormal spindle) homolog, microcephaly associated (Drosophila)
Col11a1	protein-coding	0.91424	9.68935e-05	up	Col11a1	collagen, type XI, alpha 1
Syt6	protein-coding	1.05224	0.00277816	up	Syt6	synaptotagmin VI
Cplx3	protein-coding	1.10092	3.18634e-14	up	Cplx3	complexin 3
Ciart	protein-coding	1.27095	0.00219508	up	Ciart	circadian associated repressor of transcription
Gnb3	protein-coding	1.50031	0.0377966	up	Gnb3	guanine nucleotide binding protein (G protein), beta polypeptide 3
Mctp1	protein-coding	1.51849	0.00937616	up	Mctp1	multiple C2 domains, transmembrane 1
LOC100359752	protein-coding	1.73237	0.0123783	up	LOC100359752	hypothetical protein LOC100359752
LOC103694412	protein-coding	1.78184	0.0311341	up	LOC103694412	catenin alpha-3-like
LOC103689971	protein-coding	5.06534	0.0103374	up	LOC103689971	exocyst complex component 2-like
Hist2h4a	protein-coding	9.04253	0	up	Hist2h4a	histone cluster 2, H4

## Sheet: lncRNA_MS VS Control
AccID	Length	type_of_gene	Log2FC	FDR	Expression Style	Symbol	Description
Rps2-ps2	561	pseudo	5.37888	0.000187879	up	Rps2-ps2	ribosomal protein S2, pseudogene 2
LOC100360791	764	pseudo	-3.2939	0	down	LOC100360791	tumor protein, translationally-controlled 1
LOC685935	1354	pseudo	1.083	1.34673e-05	up	LOC685935	similar to splicing factor, arginine/serine-rich 10 (transformer 2 homolog, Drosophila)
LOC103693576	1510	ncRNA	1.32878	0.0024462	up	LOC103693576	uncharacterized LOC103693576
LOC103694322	2758	ncRNA	1.17294	0.0227618	up	LOC103694322	uncharacterized LOC103694322
LOC103691124	3270	ncRNA	0.709233	2.22045e-16	up	LOC103691124	uncharacterized LOC103691124
LOC103690450	3701	ncRNA	-2.36909	0.0202692	down	LOC103690450	uncharacterized LOC103690450
LOC102554193	4196	ncRNA	-0.94019	0.0454184	down	LOC102554193	uncharacterized LOC102554193
LOC102554200	4608	pseudo	0.724306	0.00752679	up	LOC102554200	zinc finger protein 271-like
LOC103692662	5298	ncRNA	0.780963	0.00191517	up	LOC103692662	uncharacterized LOC103692662
LOC100359701	5983	pseudo	-1.52687	3.29625e-13	down	LOC100359701	rCG44996-like
LOC102550944	16358	pseudo	0.920312	0.0462843	up	LOC102550944	zinc finger protein 709-like
LOC102555051	27598	pseudo	1.1842	3.84711e-05	up	LOC102555051	zinc finger protein 709-like
LOC102547183	32557	ncRNA	0.660295	0.000409886	up	LOC102547183	uncharacterized LOC102547183
LOC102554038	35629	ncRNA	1.06745	2.37391e-06	up	LOC102554038	uncharacterized LOC102554038

## Sheet: lncRNA_EA VS MS
AccID	Length	type_of_gene	Log2FC	FDR	Expression Style	Symbol	Description
LOC100911441	487	pseudo	1.97005	0.0373754	up	LOC100911441	40S ribosomal protein S20-like
Rps2-ps2	561	pseudo	-4.73665	0.00390624	down	Rps2-ps2	ribosomal protein S2, pseudogene 2
LOC100362345	877	pseudo	1.29834	0.00552625	up	LOC100362345	hypothetical protein LOC100362345
LOC364806	1298	pseudo	3.07275	0.00409159	up	LOC364806	similar to Elongation factor 1-gamma (EF-1-gamma) (eEF-1B gamma)
LOC103690494	1449	ncRNA	1.29502	0.0036012	up	LOC103690494	uncharacterized LOC103690494
LOC103694157	1499	pseudo	0.851035	0.016228	up	LOC103694157	60S ribosomal protein L34 pseudogene
Ncl-ps1	1510	pseudo	0.72952	0.0480647	up	Ncl-ps1	nucleolin pseudogene 1
LOC684627	1588	pseudo	1.64121	0.0202605	up	LOC684627	hypothetical protein LOC684627
LOC102552913	1959	pseudo	4.75551	0.0181463	up	LOC102552913	membrane-associated progesterone receptor component 1-like
LOC102553323	2402	pseudo	0.615663	0.0112673	up	LOC102553323	E3 SUMO-protein ligase NSE2-like
LOC102555105	2646	pseudo	0.938113	0.000159389	up	LOC102555105	eukaryotic translation initiation factor 5-like
LOC103691152	2657	ncRNA	1.39493	0.000147973	up	LOC103691152	uncharacterized LOC103691152
LOC100911360	2850	ncRNA	1.1531	0.0094238	up	LOC100911360	uncharacterized LOC100911360
LOC103693402	2881	ncRNA	0.804115	0.035527	up	LOC103693402	uncharacterized LOC103693402
LOC102554595	3155	ncRNA	0.802763	0.0167503	up	LOC102554595	uncharacterized LOC102554595
LOC102548640	4019	pseudo	0.660898	0.0218596	up	LOC102548640	ribosome biogenesis protein NSA2 homolog
LOC103691390	4121	ncRNA	0.925237	0.000240803	up	LOC103691390	uncharacterized LOC103691390
LOC102546965	4124	pseudo	1.24702	0.0164136	up	LOC102546965	heterogeneous nuclear ribonucleoprotein A3-like
LOC102552941	4249	ncRNA	2.21493	0.00404806	up	LOC102552941	uncharacterized LOC102552941
LOC103694353	4449	ncRNA	1.04641	0.00263515	up	LOC103694353	uncharacterized LOC103694353
LOC103693283	5562	ncRNA	0.806484	0.0132915	up	LOC103693283	uncharacterized LOC103693283
LOC103692654	6028	pseudo	0.871686	0.0323571	up	LOC103692654	chloride intracellular channel protein 4 pseudogene
LOC103691333	6891	ncRNA	0.739229	0.000185753	up	LOC103691333	uncharacterized LOC103691333
LOC103693941	8343	ncRNA	0.748995	0.00065252	up	LOC103693941	uncharacterized LOC103693941
LOC103690445	8623	ncRNA	2.04095	0.0453775	up	LOC103690445	uncharacterized LOC103690445
LOC103691595	10869	ncRNA	0.61094	0.0070456	up	LOC103691595	uncharacterized LOC103691595
LOC103692940	11021	ncRNA	0.923885	5.23735e-06	up	LOC103692940	uncharacterized LOC103692940
LOC103693922	14753	ncRNA	0.933451	0.00101798	up	LOC103693922	uncharacterized LOC103693922
LOC102546350	16785	ncRNA	1.64273	0.0277513	up	LOC102546350	uncharacterized LOC102546350
LOC102554662	29445	ncRNA	0.958524	0.00379402	up	LOC102554662	uncharacterized LOC102554662
LOC103693721	39002	ncRNA	0.605842	0.0464324	up	LOC103693721	uncharacterized LOC103693721
LOC102549590	76359	ncRNA	0.750887	0.000939921	up	LOC102549590	uncharacterized LOC102549590

## Sheet: circRNA_MS VS Control
AccID	Log2FC	FDR	Style	CHROM	start	end	strand	GeneName	CircType	SeqLength
chr1_121848757_121281853_-566904-LOC102555866	-20	6.47882e-12	Expression down	chr1	121281852	121848757	-	LOC102555866	UnKnown	566905
chr1_157659725_157646235_+13490-Rab30	-2.47917	0.000562421	down	chr1	157646234	157659725	+	Rab30	Exonic	1034
chr1_25284394_25216049_+68345-Clvs2	-1.98272	0.0256414	down	chr1	25216048	25284394	+	Clvs2	UnKnown	68346
chr2_116594945_116586880_+8065-Egfem1	-2.40881	0.00142934	down	chr2	116586879	116594945	+	Egfem1	Intronic	8066
chr7_87572022_87543252_-28770-Csmd3	-2.67807	0.00410021	down	chr7	87543251	87572022	-	Csmd3	Exonic	466
chrx_63182385_63177769_-4616-na	-0.607954	0.0139145	down	chrx	63177768	63182385	-	na	Unknown	4617
chr19_25647653_25632216_+15437-Cacna1a	-2.80735	0.00423807	down	chr19	25632215	25647653	+	Cacna1a	Exonic	564
chr1_102660697_102645520_-15177-Sergef	-1.34702	0.0315323	down	chr1	102645519	102660697	-	Sergef	Exonic	562
chr1_146109307_146108193_-1114-Cemip	-2.85244	0.0363488	down	chr1	146108192	146109307	-	Cemip	Exonic	386
chr4_15780820_15760711_-20109-Cacna2d1	-1.70328	0.0490556	down	chr4	15760710	15780820	-	Cacna2d1	Exonic	711
chr6_57769491_57720453_+49038-Dgkb	-1.79941	0.00194324	down	chr6	57720452	57769491	+	Dgkb	Exonic	963
chr9_89170668_89131839_-38829-Sphkap	-2.48239	0.0291365	down	chr9	89131838	89170668	-	Sphkap	Exonic	287
chr2_84576615_84568895_-7720-March6	-4.16993	0.0189261	down	chr2	84568894	84576615	-	March6	Exonic	506
chr8_131730485_131711421_+19064-LOC103690480	-4.24793	0.0015424	down	chr8	131711420	131730485	+	LOC103690480	UnKnown	19065
chr16_77665107_77660199_+4908-Csmd1	-3.0199	0.000579441	down	chr16	77660198	77665107	+	Csmd1	Intronic	4909
chr9_28451547_28444521_-7026-Rims1	-3.08746	0.0245431	down	chr9	28444520	28451547	-	Rims1	Exonic	494
chr1_65166133_65154293_-11840-LOC102549498	-3.72792	0.00387556	down	chr1	65154292	65166133	-	LOC102549498	Exonic	1091
chr10_26175958_26175541_+417-na	2.80735	0.000233979	up	chr10	26175540	26175958	+	na	Unknown	418
chr8_131462801_131180202_+282599-LOC102554597	1.43769	0.0483135	up	chr8	131180201	131462801	+	LOC102554597	UnKnown	282600
chr14_40035210_39985575_+49635-Gabrg1	2.57827	6.97505e-05	up	chr14	39985574	40035210	+	Gabrg1	Exonic	1024
chr17_9618606_9611269_+7337-Fam193b	2.76081	0.019376	up	chr17	9611268	9618606	+	Fam193b	Exonic	1150
chr1_128242835_128239552_-3283-Mef2a	1.926	0.014721	up	chr1	128239551	128242835	-	Mef2a	Exonic	418
chr20_47896656_47893649_-3007-Sobp	1.70627	0.0140829	up	chr20	47893648	47896656	-	Sobp	Exonic	325
chr2_53989287_53934100_+55187-Oxct1	2.152	0.0195583	up	chr2	53934099	53989287	+	Oxct1	Exonic	422
chr4_28520904_28494651_+26253-Ccdc132	3.22239	0.00196386	up	chr4	28494650	28520904	+	Ccdc132	Exonic	688
chr4_9997091_9981942_+15149-Napepld	2.37197	0.0115227	up	chr4	9981941	9997091	+	Napepld	Exonic	1072
chr5_150908710_150880355_+28355-Eya3	3.34577	0.00246161	up	chr5	150880354	150908710	+	Eya3	Exonic	1139
chr7_122005110_121971241_+33869-Tnrc6b	2.05889	0.0434603	up	chr7	121971240	122005110	+	Tnrc6b	Exonic	228
chr14_91510219_91468957_-41262-Zpbp	2.61667	0.0109155	up	chr14	91468956	91510219	-	Zpbp	Exonic	572
chr17_739440_694609_+44831-Npepo	1.05703	0.000127342	up	chr17	694608	739440	+	Npepo	Exonic	613
chr2_72456103_72455850_+253-Cdh12	1.82397	0.018659	up	chr2	72455849	72456103	+	Cdh12	Exonic	254
chr6_26406778_26405813_+965-Ift172	2.39232	0.00823102	up	chr6	26405812	26406778	+	Ift172	Exonic	281
chr4_8242710_8223840_-18870-Kmt2e	1.37656	0.00818778	up	chr4	8223839	8242710	-	Kmt2e	Intronic	18871
chr13_96153577_96141606_+11971-Desi2	3.45943	0.0238269	up	chr13	96141605	96153577	+	Desi2	Exonic	495
chr14_42809348_42803980_-5368-Limch1	3.16993	0.0116559	up	chr14	42803979	42809348	-	Limch1	Exonic	916
chr10_18258433_18238462_-19971-Ranbp17	3.70044	0.0365003	up	chr10	18238461	18258433	-	Ranbp17	Exonic	388
chr1_195866944_195625166_-241778-LOC102549884	20	0	up	chr1	195625165	195866944	-	LOC102549884	UnKnown	241779

## Sheet: circRNA_EA VS MS
AccID	Log2FC	FDR	Expression Style	CHROM	start	end	strand	GeneName	CircType	SeqLength
chr7_104951110_104776120_-174990-Asap1	-2.152	0.0156403	down	chr7	104776119	104951110	-	Asap1	UnKnown	174991
chr14_42104685_42079272_+25413-Atp8a1	-1.62936	0.0456805	down	chr14	42079271	42104685	+	Atp8a1	Exonic	607
chr10_66783965_66766206_+17759-Nf1	-2.2854	0.00312182	down	chr10	66766205	66783965	+	Nf1	Exonic	747
chr10_72212356_72203091_+9265-Myo19	-1.89947	9.59275e-05	down	chr10	72203090	72212356	+	Myo19	Exonic	805
chr12_39635912_39627016_-8896-Anapc7	-0.678072	0.0273177	down	chr12	39627015	39635912	-	Anapc7	Exonic	386
chr17_10107746_10090031_+17715-Uimc1	-3.33985	0.0143248	down	chr17	10090030	10107746	+	Uimc1	Exonic	1110
chr18_17224348_17218299_+6049-Fhod3	-1.8635	0.00410696	down	chr18	17218298	17224348	+	Fhod3	Exonic	462
chr18_17289722_17224244_+65478-Fhod3	-1.2362	0.0194178	down	chr18	17224243	17289722	+	Fhod3	Exonic	1660
chr18_59283798_59190041_+93757-Wdr7	-3.90689	0.0118518	down	chr18	59190040	59283798	+	Wdr7	Exonic	1531
chr2_30458542_30453217_-5325-Naip5	-2.58496	0.0403402	down	chr2	30453216	30458542	-	Naip5	Exonic	805
chr3_112291953_112288444_-3509-LOC688018	-4.39232	0.03194	down	chr3	112288443	112291953	-	LOC688018	Exonic	372
chr6_109745287_109729890_+15397-Ttll5	-1.02895	3.01303e-06	down	chr6	109729889	109745287	+	Ttll5	Exonic	457
chr6_136093254_136059672_+33582-Mark3	-1.50986	0.0112658	down	chr6	136059671	136093254	+	Mark3	Exonic	489
chr7_52258952_52258464_-488-Nav3	-2.72792	0.0429941	down	chr7	52258463	52258952	-	Nav3	Exonic	489
chr7_73748233_73684650_-63583-Stk3	-2.39232	0.00776148	down	chr7	73684649	73748233	-	Stk3	Exonic	633
chr7_80745256_80721364_+23892-Oxr1	-1.44057	0.00847089	down	chr7	80721363	80745256	+	Oxr1	Exonic	1736
chr9_112377503_112317485_+60018-Man2a1	-2.9542	0.00337218	down	chr9	112317484	112377503	+	Man2a1	Exonic	1808
chr9_73799430_73766839_-32591-Kansl1l	-1.05311	0.00986551	down	chr9	73766838	73799430	-	Kansl1l	Exonic	1582
chr13_53186162_53175100_-11062-Camsap2	-4.16993	0.00459376	down	chr13	53175099	53186162	-	Camsap2	Exonic	561
chr17_739440_694609_+44831-Npepo	-1.59619	0.00174125	down	chr17	694608	739440	+	Npepo	Exonic	613
chr2_187529234_187527683_+1551-Mef2d	-2.07682	0.00414447	down	chr2	187527682	187529234	+	Mef2d	Exonic	406
chr2_72456103_72455850_+253-Cdh12	-5.03342	8.59683e-08	down	chr2	72455849	72456103	+	Cdh12	Exonic	254
chr6_38619590_38607521_+12069-Nbas	-3.2854	0.000788628	down	chr6	38607520	38619590	+	Nbas	Exonic	589
chr2_2769957_2758476_-11481-Rfesd	-2.26679	0.0168176	down	chr2	2758475	2769957	-	Rfesd	Intronic	11482
chr5_38261819_38257494_+4325-na	-2.56478	0.0102416	down	chr5	38257493	38261819	+	na	Unknown	4326
chr7_78247197_78170329_+76868-Rims2	-2.85798	0.0461038	down	chr7	78170328	78247197	+	Rims2	Exonic	654
chr4_118788491_118773297_+15194-Aak1	-2.44294	0.00663353	down	chr4	118773296	118788491	+	Aak1	Exonic	411
chr18_15490831_15480332_+10499-B4galt6	-20	0	down	chr18	15480331	15490831	+	B4galt6	Intronic	10500
chr13_95348984_95230647_-118337-Akt3	2.28011	0.0433277	up	chr13	95230646	95348984	-	Akt3	UnKnown	118338
chr1_121848757_121281853_-566904-LOC102555866	20	0	up	chr1	121281852	121848757	-	LOC102555866	UnKnown	566905
chr1_122678378_122605870_-72508-LOC102546918	0.960034	0.0179571	up	chr1	122605869	122678378	-	LOC102546918	Exonic	332
chr1_195840151_195805819_-34332-LOC102549884	20	0	up	chr1	195805818	195840151	-	LOC102549884	UnKnown	34333
chr10_13933066_13931236_+1830-Pkd1	2.23447	0.0491136	up	chr10	13931235	13933066	+	Pkd1	Exonic	1170
chr10_38633058_38622808_-10250-Hspa4	2.25277	0.0325179	up	chr10	38622807	38633058	-	Hspa4	Exonic	801
chr11_53178615_53140598_+38017-Bbx	1.57374	0.00781788	up	chr11	53140597	53178615	+	Bbx	Exonic	915
chr17_728329_694609_+33720-Npepo	2	6.09699e-07	up	chr17	694608	728329	+	Npepo	Exonic	552
chr18_77520779_77512807_-7972-Atp9b	1.6256	0.0293315	up	chr18	77512806	77520779	-	Atp9b	Exonic	439
chr1_154418787_154406807_+11980-Picalm	1.66985	0.030215	up	chr1	154406806	154418787	+	Picalm	Exonic	492
chr1_209795897_209792071_+3826-Glrx3	2.5025	0.0259612	up	chr1	209792070	209795897	+	Glrx3	Exonic	346
chr6_76626199_76616895_-9304-Ralgapa1	1.47644	0.0192252	up	chr6	76616894	76626199	-	Ralgapa1	Exonic	441
chr7_114562987_114540879_-22108-Ptk2	3.11548	0.025133	up	chr7	114540878	114562987	-	Ptk2	Exonic	453
chr8_6883387_6880587_+2800-Trpc6	2.08246	0.0382397	up	chr8	6880586	6883387	+	Trpc6	Exonic	348
chr8_85444178_85436186_+7992-Ick	1.90378	0.00778846	up	chr8	85436185	85444178	+	Ick	Exonic	530
chr9_119706127_119694338_-11789-Smchd1	4.80735	0.0373912	up	chr9	119694337	119706127	-	Smchd1	Exonic	1201
chr1_13390557_11837734_-1552823-Ect2l	20	0	up	chr1	11837733	13390557	-	Ect2l	UnKnown	1552824
chr2_210778477_210723388_-55089-Gstm3	20	4.67776e-06	up	chr2	210723387	210778477	-	Gstm3	UnKnown	55090
